4. Huggins, R. A.; Glass, W. G., and Bryan, A. R.: Protective Action of *N*-allyl-normorphine Against Respiratory Depression Produced by Some Compounds Related to Morphine, *Proc. Soc. Exper. Biol. & Med.* **75**: 540-541 (Nov.) 1950.
5. Smith, C. C.; Lehman, E. G., and Gilfillan, J. L.: Antagonistic Action of *N*-allyl-normorphine Upon the Analgetic and Toxic Effects of Morphine, Methadone Derivatives and Isopropyl-pecaine, *Federation Proc.* **10**: 335, 1951.
6. Blohm, T. R., and Wellmore, W. G.: Effects of *N*-allyl-normorphine on Cholinesterase, *Federation Proc.* **10**: 163, 1951.
7. Wikler, A.: Effect of Large Doses of *N*-allyl-normorphine on Man, *Federation Proc.* **10**: 345, 1951 (Abstract of Paper).
8. Eckenhoff, J. E.; Elder, J. D., and King, B. D.: *N*-allyl-normorphine in the Treatment of Morphine or Demerol Narcosis, *Am. J. M. Sc.* **223**: 191-197 (Feb.) 1952.
9. Frazer, H. F.; Wikler, A.; Eisenman, A. J., and Isbell, H.: *N*-allyl-normorphine in the Treatment of Methadone Poisoning, unpublished data.

---

### THE AMERICAN BOARD OF ANESTHESIOLOGY

Written examinations of the American Board of Anesthesiology will be held in various locations, July 18, 1952. The oral examinations will be held in Swampscott, Massachusetts, September 28-October 1, 1952.

---

### THE AMERICAN COLLEGE OF ANESTHESIOLOGISTS

Written examinations for candidates for Fellow of The American College of Anesthesiologists will be held in various locations on October 18, 1952. Candidates wishing to take the examination must file their applications in the office of the College not later than July 18, 1952. These applications should be sent to: The American College of Anesthesiologists, 137 West 11th Street, New York 11, New York.
